# Supplementary material for: Behavioral Health Diagnoses Among Children and Adolescents Hospitalized in the United States: Observations and Implications
Source: Atypon-hosted journal article supplement (doi:10.1176/appi.ps.201700389), 2018-06-01
Supplement: appi.ps.201700389.ds001.pdf [file appi.ps.201700389.ds001.pdf]

**Online Supplement****Supplemental Methods. Propensity analysis**

Only pediatric hospitalizations for patients  $6 \leq \text{age} \leq 18$  with home discharge disposition and primary physical diagnoses and BMH comorbidity were included in this analysis. Total number of hospitalizations for  $6 \leq \text{age} \leq 18$  patients was 1009295, among them 109626 had psychiatric comorbidity and (10.86%). Among those with comorbidity, 95436 (87%) were discharged home. The control group used for propensity analysis included 846745 hospitalizations for patients' age 6-18 years old without psychiatric discharged home. Hospitalizations with maternal diagnoses or procedure were excluded. The propensity score was calculated with logistic regression where the dependent variable was psychiatric comorbidity and independent variables included: hospitalization level characteristics (patient age, sex, race, type of admission (elective), admission from emergency department, transfer from another institution, operative room procedure and clinical classification diagnoses categories) and hospital characteristics including region, rural location) and survey weights. Inclusion of survey weights as a co-variate in the propensity model was recommended by Dugoff EH1, Schuler M, Stuart EA(15) (Generalizing observational study results: applying propensity score methods to complex surveys. Health Serv Res. 2014 Feb;49(1):284-303). Hospitalizations were matched on 1:1 basis using a greedy algorithm.(12) We identified 84945 pairs that we used for analysis of outcomes. After the matching, we used standard techniques to assure a good match, including paired t-test for normally distributed continuous variables, McNemar test for categorical variables, and standardized differences.(16) We control for survey design when we estimated cost and length of stay for propensity matched groups. The costs and length of stay for propensity matched hospitalizations with and without psychiatric comorbidity were compared using non-parametric Wilcoxon signed rank test.

Supplemental Table 1. ICD9 codes for identification of pediatric hospitalizations with mental disorders.

| <b>Mental disorder category</b> | <b>ICD9-CM codes</b>                                                                                                                                                                                                                                                                                                                                                                                                   |
|---------------------------------|------------------------------------------------------------------------------------------------------------------------------------------------------------------------------------------------------------------------------------------------------------------------------------------------------------------------------------------------------------------------------------------------------------------------|
| ADD/hyperkinetic                | 314, 314.0, 314.01, 314.1, 314.2, 314.8, 314.9                                                                                                                                                                                                                                                                                                                                                                         |
| Mood Disorder                   | 293.83, 296, 296.00, 296.01, 296.02, 296.03, 296.04, 296.05, 296.06, 296.10, 296.11, 296.12, 296.13, 296.14, 296.15, 296.16, 296.40, 296.41, 296.42, 296.43, 296.44, 296.45, 296.46, 296.50, 296.51, 296.52, 296.53, 296.54, 296.55, 296.56, 296.60, 296.61, 296.62, 296.63, 296.64, 296.65, 296.66, 296.7, 296.80, 296.81, 296.82, 296.89, 296.90, 296.99, 301.1, 301.10, 301.11, 301.12, 301.13, 309.0, 309.1, 313.1 |
| Depression                      | 296.2, 296.20, 296.21, 296.22, 296.23, 296.24, 296.25, 296.26, 296.3, 296.30, 296.31, 206.32, 296.33, 296.34, 296.35, 296.36, 300.4, 311                                                                                                                                                                                                                                                                               |
| Post-traumatic stress           | 309.81                                                                                                                                                                                                                                                                                                                                                                                                                 |
| Anxiety                         | 300.0, 300.00, 300.01, 300.02, 300.09, 300.1, 300.10, 300.11, 300.12, 300.13, 300.14, 300.15, 300.16, 300.19, 300.2, 300.20, 300.21, 300.22, 300.23, 300.29, 300.3, 300.7, 313.0, 313.2, 313.21, 313.22, 313.23, 309.4, 309.82, 309.83, 309.89, 309.9                                                                                                                                                                  |
| Oppositional                    | 313.81, 309.3                                                                                                                                                                                                                                                                                                                                                                                                          |

|                                   |                                                                                                                                                                                                                                                                                                                                                                                                                                                                                                                                                                                                                                                                                                                                                                                                                                                                                                                                                                                                                                                                                     |
|-----------------------------------|-------------------------------------------------------------------------------------------------------------------------------------------------------------------------------------------------------------------------------------------------------------------------------------------------------------------------------------------------------------------------------------------------------------------------------------------------------------------------------------------------------------------------------------------------------------------------------------------------------------------------------------------------------------------------------------------------------------------------------------------------------------------------------------------------------------------------------------------------------------------------------------------------------------------------------------------------------------------------------------------------------------------------------------------------------------------------------------|
| Psychotic                         | 295, 295.0, 295.00, 295.01, 295.02, 295.03, 295.04, 295.05, 295.1, 295.10, 295.11, 295.12, 295.13, 295.14, 295.15, 295.2, 295.20, 295.21, 295.22, 295.23, 295.24, 295.25, 295.3, 295.30, 295.31, 295.32, 295.33, 295.34, 295.35, 295.4, 295.40, 295.41, 295.42, 295.43, 295.44, 295.45, 295.5, 295.50, 295.51, 295.52, 295.53, 295.54, 295.55, 295.6, 295.60, 295.61, 295.62, 295.63, 295.64, 295.65, 295.7, 295.70, 295.71, 295.72, 295.73, 295.74, 295.75, 295.8, 295.80, 295.81, 295.82, 295.83, 295.84, 295.85, 295.9, 295.90, 295.91, 295.92, 295.93, 295.94, 295.95, 297, 297.0, 297.1, 297.2, 297.3, 297.8, 297.9, 298, 298.1, 298.2, 298.3, 298.4, 298.8, 298.9                                                                                                                                                                                                                                                                                                                                                                                                             |
| Pervasive developmental disorders | 299, 299.0, 299.01, 299.02, 299.1, 299.10, 299.12, 299.8, 299.81, 299.82, 299.9, 299.91, 299.92                                                                                                                                                                                                                                                                                                                                                                                                                                                                                                                                                                                                                                                                                                                                                                                                                                                                                                                                                                                     |
| Somatoform                        | 300.8, 300.81, 300.82, 300.89, 307.8, 307.80, 307.81, 307.89                                                                                                                                                                                                                                                                                                                                                                                                                                                                                                                                                                                                                                                                                                                                                                                                                                                                                                                                                                                                                        |
| Eating disorders                  | 307.1, 307.5, 307.50, 307.51, 307.52, 307.53, 307.54, 207.59                                                                                                                                                                                                                                                                                                                                                                                                                                                                                                                                                                                                                                                                                                                                                                                                                                                                                                                                                                                                                        |
| Tic disorders                     | 307.2, 307.20, 307.21, 307.22, 307.23, 333.3                                                                                                                                                                                                                                                                                                                                                                                                                                                                                                                                                                                                                                                                                                                                                                                                                                                                                                                                                                                                                                        |
| Substance/alcohol use*            | 291.0, 291.1, 291.2, 291.3, 291.4, 291.5, 291.8, 291.81, 291.82, 291.89, 291.9, 303.00, 303.01, 303.02, 303.03, 303.90, 303.91, 303.92, 303.93, 305.00, 305.01, 305.02, 305.03, 760.71, 980.0, 357.5, 425.5, 535.30, 535.31, 571.0, 571.1, 571.2, 571.3, 292.0, 292.11, 292.12, 292.2, 292.81, 292.82, 292.83, 292.84, 292.85, 292.89, 292.9, 304.00, 304.01, 304.02, 304.03, 304.10, 304.11, 304.12, 304.13, 304.20, 304.21, 304.22, 304.23, 304.30, 304.31, 304.32, 304.33, 304.40, 304.41, 304.42, 304.43, 304.50, 304.51, 304.52, 304.53, 304.60, 304.61, 304.62, 304.63, 304.70, 304.71, 304.72, 304.73, 304.80, 304.81, 304.82, 304.83, 304.90, 304.91, 304.92, 304.93, 305.20, 305.21, 305.22, 305.23, 305.30, 305.31, 305.32, 305.33, 305.40, 305.41, 305.42, 305.43, 305.50, 305.51, 305.52, 305.53, 305.60, 305.61, 305.62, 305.63, 305.70, 305.71, 305.72, 305.73, 305.80, 305.81, 305.82, 305.83, 305.90, 305.91, 305.92, 305.93, 648.30, 648.31, 648.32, 648.33, 648.34, 655.50, 655.51, 655.53, 760.72, 760.73, 760.75, 779.5, 965.00, 965.01, 965.02, 965.09, V65.42 |
| Suicide/self-injury**             | E95.00, E95.01, E95.02, E95.03, E95.04, E95.05, E95.06, E95.07, E95.08, E95.09, E95.10, E95.11, E95.18, E95.20, E95.21, E95.28, E95.29, E95.30, E95.31, E95.38, E95.39, E95.4, E95.50, E95.51, E95.52, E95.53, E95.54, E95.55, E95.56, E95.57, E95.59, E95.6, E95.70, E95.71, E95.72, E95.79, E95.80, E95.81, E95.82, E95.83, E95.84, E95.85, E95.86, E95.87, E95.88, E95.89, E95.9, V62.84                                                                                                                                                                                                                                                                                                                                                                                                                                                                                                                                                                                                                                                                                         |
| Peripartum mental disorders       | 648.4, 648.40, 648.41, 648.42, 648.43, 648.44                                                                                                                                                                                                                                                                                                                                                                                                                                                                                                                                                                                                                                                                                                                                                                                                                                                                                                                                                                                                                                       |
| Other disorders                   | 290, 290.0, 290.1, 290.10, 290.11, 290.12, 290.13, 290.2, 290.20, 290.21, 290.3, 290.4, 290.40, 290.41, 290.42, 290.43, 290.8, 293, 293.0, 293.1, 293.8, 293.81, 293.82, 293.83, 293.84, 293.89, 293.9, 294, 294.0, 294.1, 294.10, 294.11, 294.8, 294.9, 300.6, 300.9, 301.0, 301.2, 301.20, 301.21, 301.22, 301.3, 301.4, 301.5, 301.50, 301.51, 301.59, 301.6, 301.7, 301.8, 301.81, 301.82, 301.83, 301.84, 301.89, 301.9, 302, 302.0, 302.1, 302.2, 302.4, 302.4, 306, 306.0, 306.1, 306.2, 306.3, 306.4, 306.5, 306.6, 306.7, 306.8, 306.9, 307.0, 307.3, 307.4, 307.40, 307.41, 307.42, 307.43, 307.44, 307.45, 307.46, 307.47, 307.48, 307.49, 307.6, 307.7, 310, 310.0, 310.1,                                                                                                                                                                                                                                                                                                                                                                                              |

|  |                                                                                                                                                                                                             |
|--|-------------------------------------------------------------------------------------------------------------------------------------------------------------------------------------------------------------|
|  | 310.2, 310.8, 310.9, 312, 312.0, 312.00, 312.01, 312.02, 312.03, 312.1, 312.10, 312.11, 312.12, 312.13, 312.30, 312.31, 312.32, 312.33, 312.34, 312.35, 312.39, 312.4, 312.8, 312.81, 312.82, 312.89, 312.9 |
|--|-------------------------------------------------------------------------------------------------------------------------------------------------------------------------------------------------------------|

\* Based on clinical classification software (CCS) 660, 661

\*\* Based on clinical classification software (CCS) 662

Supplemental Table 2. Comorbid psychiatric diagnoses for children age 0-20. Diagonal represents number of hospitalizations with primary psychiatric diagnoses. Percentages represent the associated psychiatric disorders for hospitalizations with the primary psychiatric diagnoses. The bottom line represents percentage of hospitalizations with the solitary primary psychiatric diagnosis.

| Prim                  | ADD   | Depression | Other Mood d/o | Post-traumatic stress | Anxiety | Oppositional | Psychotic | Pervasive | Somatoform | Eating | Tic   | Substance alcohol | Self Injury | Peripartum (Maternal) | Other |
|-----------------------|-------|------------|----------------|-----------------------|---------|--------------|-----------|-----------|------------|--------|-------|-------------------|-------------|-----------------------|-------|
| 2º Dx                 |       |            |                |                       |         |              |           |           |            |        |       |                   |             |                       |       |
| ADD                   | 5659  |            |                |                       |         |              |           |           |            |        |       |                   |             |                       |       |
| Depression            | 13.3% | 86853      |                |                       |         |              |           |           |            |        |       |                   |             |                       |       |
| Other Mood d/o        | 27.1% | 5.8%       | 78246          |                       |         |              |           |           |            |        |       |                   |             |                       |       |
| Post-traum. stress    | 7.8%  | 4.5%       | 11.1%          | 3888                  |         |              |           |           |            |        |       |                   |             |                       |       |
| Anxiety               | 13.6% | 24.4%      | 13.8%          | 15.3%                 | 11183   |              |           |           |            |        |       |                   |             |                       |       |
| Oppositional          | 42.6% | 8.2%       | 16.2%          | 12.1%                 | 9.5%    | 4369         |           |           |            |        |       |                   |             |                       |       |
| Psychotic             | 2.6%  | 1.6%       | 4.0%           | 4.5%                  | 2.5%    | 1.6%         | 23108     |           |            |        |       |                   |             |                       |       |
| Pervasive             | 7.8%  | 1.9%       | 5.5%           | 2.7%                  | 4.1%    | 4.8%         | 3.7%      | 2371      |            |        |       |                   |             |                       |       |
| Somatoform            | 0.02% | 0.09%      | 0.05%          | 0.1%                  | 0.6%    | 0%           | 0.1%      | 0.0%      | 167        |        |       |                   |             |                       |       |
| Eating d/o            | 0.4%  | 3.4%       | 1.4%           | 2.3%                  | 1.7%    | 0.4%         | 0.7%      | 0.4%      | 2.6%       | 3355   |       |                   |             |                       |       |
| Tic d/o               | 1.4%  | 0.4%       | 0.7%           | 0.5%                  | 1.0%    | 0.8%         | 0.5%      | 2.4%      | 0.0%       | 0.3%   | 422   |                   |             |                       |       |
| Substance alcohol use | 7.7%  | 24.2%      | 26.4%          | 14.6%                 | 19.0%   | 16.6%        | 37.4%     | 3.2%      | 9.9%       | 6.5%   | 1.0%  | 17751             |             |                       |       |
| Suicide/self Inj      | 14.8% | 52.8%      | 35.4%          | 39.5%                 | 28.6%   | 22.5%        | 19.9%     | 13.6%     | 4.1%       | 8.4%   | 1.8%  | 14.6%             | 363         |                       |       |
| Peripartum            | 0%    | 0.08%      | 0.07%          | 0.1%                  | 0.2%    | 0.0%         | 0.1%      | 0.0%      | 0.0%       | 0%     | 0%    | 0.9%              | 0.0%        | 4479                  |       |
| Other d/o             | 25.9% | 18.4%      | 24.8%          | 21.4%                 | 16.8%   | 24.3%        | 12.5%     | 29.4%     | 9.9%       | 6.9%   | 9.2%  | 9.9%              | 14.0%       | 9.9%                  | 11770 |
| Solitary              | 10.6% | 14.4%      | 14.2%          | 8.8%                  | 25.1%   | 11.2%        | 27.9%     | 21.8%     | 38.3%      | 28.6%  | 48.4% | 44.4%             | 13.2%       | 4.0%                  | 22.3% |

2º Dx - Secondary diagnosis

Supplemental Table 3. The most frequent physical diagnoses for hospitalizations of children 6-18 years of age and associated psychiatric comorbidities

| Order | Primary DX                                    | N (%)       | N (% of hosp with psychiatric comorbidities) | Most frequent secondary psychiatric Dx | %            |
|-------|-----------------------------------------------|-------------|----------------------------------------------|----------------------------------------|--------------|
| 1     | Acute Appendicitis                            | 68112 (6.5) | 3741 (5.5)                                   | ADD                                    | 3.5          |
| 2     | Asthma                                        | 54913 (5.3) | 4694 (8.5)                                   | ADD                                    | 5.0          |
| 3     | Trauma during delivery                        | 34459 (3.3) | 1253 (3.6)                                   | Peripartum                             | 3.3          |
| 4     | Diabetes                                      | 33235 (3.2) | 5878 (17.7)                                  | ADD<br>Depression                      | 6.4<br>6.2   |
| 5     | Chemotherapy                                  | 29572(2.8)  | 3458 (11.7)                                  | Anxiety                                | 4.7          |
| 6     | Pneumonia                                     | 27926(2.7)  | 2273 (8.1)                                   | ADD                                    | 4.0          |
| 7     | Epilepsy                                      | 26974(2.6)  | 7712 (28.6)                                  | ADD<br>Pervasive                       | 11.4<br>10.3 |
| 8     | Cellulitis and abscess                        | 23687 (2.3) | 2903 (12.3)                                  | ADD                                    | 6.5          |
| 9     | General Symptoms                              | 18747 (1.8) | 5703 (30.4)                                  | ADD<br>Depression                      | 11.7<br>5.6  |
| 10    | Other mother condition complicating pregnancy | 18646 (1.8) | 1259 (6.8)                                   | Peripartum                             | 5.5          |

|           |                                                         |             |             |                |            |
|-----------|---------------------------------------------------------|-------------|-------------|----------------|------------|
| <b>11</b> | Other indication for care related to labor and delivery | 18140 (1.7) | 892 (4.9)   | Peripartum     | 4.4        |
| <b>12</b> | Hereditary hemolytic anemias                            | 16996 (1.6) | 1592 (9.4)  | Depression     | 3.1        |
| <b>13</b> | Late pregnancy                                          | 15892 (1.5) | 886 (5.6)   | Peripartum     | 5.0        |
| <b>14</b> | Complications of surgical and medical care              | 14910 (1.4) | 1825 (12.2) | ADD<br>Anxiety | 4.4<br>3.0 |
| <b>15</b> | Disorder of fluid electrolyte                           | 13586 (1.3) | 2000 (14.7) | ADD<br>Anxiety | 4.7<br>3.7 |
